# Supplementary material
Source: Springer Nature journal article supplement (https://www.springermedizin.de/resource/supplementary/12887_2012_796_MOESM3_ESM.pdf/9476244)

# Weight gain (gr)

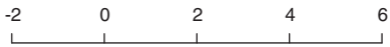

OMT

GA

Milk

Weight

Gender

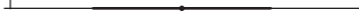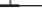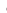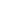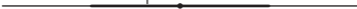

Supplement: MOESM3 [file 9476244]
